# Supplementary material
Source: PubMed Central journal article supplement (PMC6204345)
Supplement: NIHMS1503934-supplement-1.pdf [file NIHMS1503934-supplement-1.pdf]

## Supplementary Tables

| <b>Table S1   synOptopatch constructs</b>               | <b>Vector</b> | <b>Addgene</b> |
|---------------------------------------------------------|---------------|----------------|
| LZF40: hSyn-Cre                                         | Lenti-vector  | 109378         |
| LZF43: Cre-on CAG-CheRiff-CFP (DIO)                     | Lenti-vector  | 104114         |
| LZF80: Cre-on CAG-CheRiff-soma-CFP (DIO)                | Lenti-vector  | 104115         |
| LZF42: Cre-off hSyn-QuasAr2-Citrine ( <i>FAS</i> )      | Lenti-vector  | 104116         |
| LZF70: Cre-off hSyn-QuasAr2-dark Citrine ( <i>FAS</i> ) | Lenti-vector  | 104117         |
| LZF39: Cre-off hSyn-CheRiff-CFP ( <i>FAS</i> )          | Lenti-vector  | 104118         |
| LZF1718: Cre-off hSyn-CheRiff-CFP ( <i>FAS</i> )        | AAV vector    | 104119         |
| LZF94: Cre-on CAG-spine-GCaMP6s                         | AAV vector    | 104120         |
| LZF97: hSyn-spine-jRGECO1a                              | Lenti-vector  | 104121         |
| LZF1604: CAG-spine-jRGECO1a-P2A-QuasAr2-dark Citrine    | pcDNA         | 104122         |
| LZF1723: mI12b-EGFP                                     | Lenti-vector  | 104123         |
